# Supplementary material for: Preparation of Super-Hydrophobic 3D Porous Nanocomposites by One Step Reaction at Room Temperature for Water Treatment
Source: MDPI journal article supplement (doi:10.3390/coatings11050521), 2021-04-29
Supplement: s1 [file s1]

Article

# Preparation of Super-Hydrophobic 3D Porous Nanocomposites by One Step Reaction at Room Temperature for Water Treatment

Liping Ding <sup>1,2</sup>, Jianmin Su <sup>1</sup>, Zeyu Cao <sup>1</sup>, Peng Zhu <sup>1,2,\*</sup>, Yuan Liu <sup>1,2,\*</sup>

<sup>1</sup> School of Chemistry and Chemical Engineering, Nantong University, Nantong 226007, China; dingliping@ntu.edu.cn (L.D.); 1908110075@stmail.ntu.edu.cn (J.S.); 1921110047@stmail.ntu.edu.cn (Z.C.)

<sup>2</sup> Nantong Key Lab of Intelligent and New Energy Materials, Nantong University, Nantong 226019, China

\* Correspondence: pzhu@ntu.edu.cn (P.Z.); liuyuan1105@ntu.edu.cn (Y.L.)

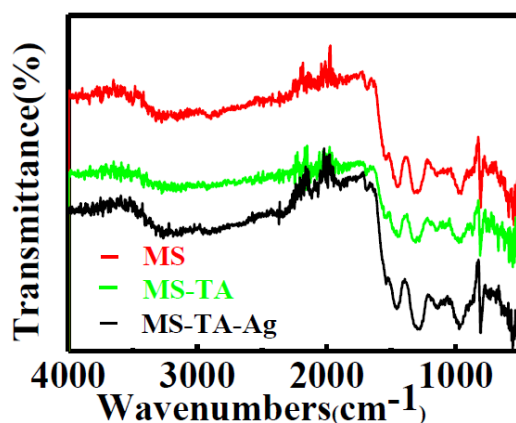

Figure S1. The FT-IR spectrum of the unmodified MS and modified MS.

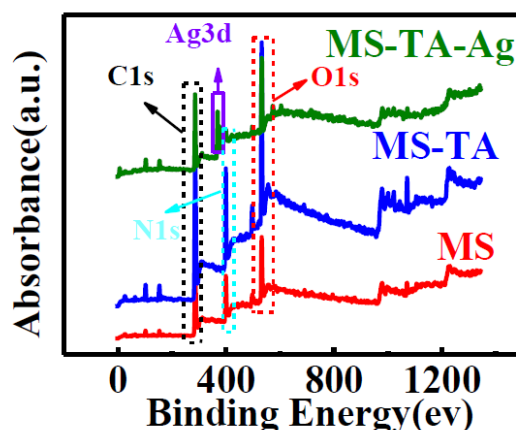

Figure S2. The XPS spectrum of the unmodified MS and modified MS.
